# Supplementary figures and images for: The Effect of RADA16-I and CDNF on Neurogenesis and Neuroprotection in Brain Ischemia-Reperfusion Injury
Source: MDPI journal article supplement (doi:10.3390/ijms23031436), 2022-01-27

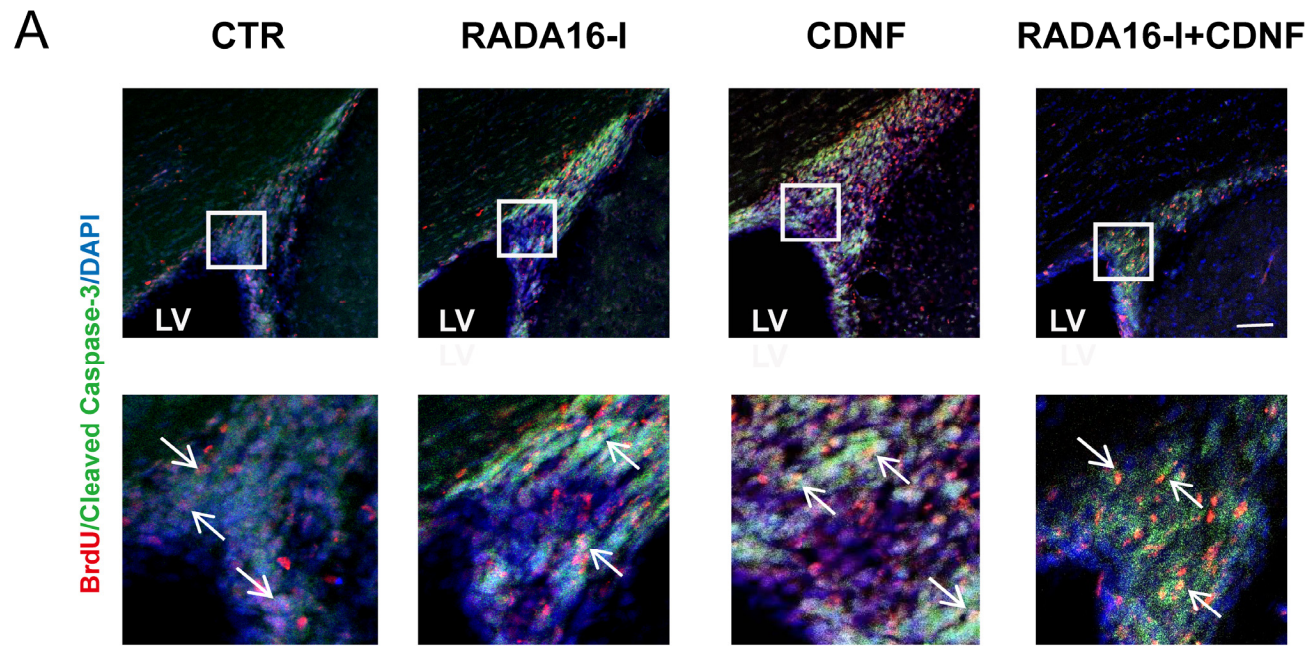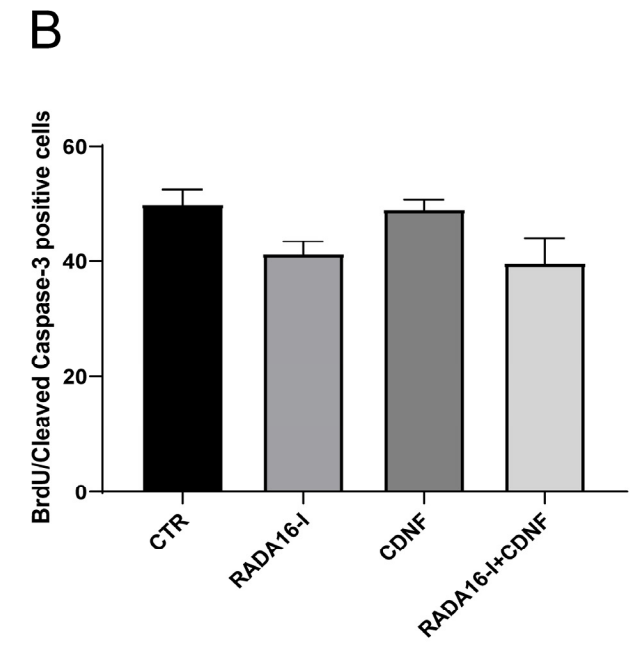

Supplement: s1 [file s1]
